# Supplementary material for: Structure and property tunability in monolayer halide lead-free double hybrid perovskites: effects of Rashba and biaxial strain
Source: Royal Society of Chemistry journal article supplement (doi:10.1039/c9ta01647c), 2019-01-01
Supplement: c9ta01647c1.pdf [file c9ta01647c1.pdf]

# Journal Name

## ARTICLE TYPE

Cite this: DOI: 00.0000/xxxxxxxxxx

## Supporting Information : Structure and Property Tunability in Monolayer Halide Lead-Free Double Hybrid Perovskites: Effects of Rashba and Biaxial Strain<sup>†</sup>

Qi Liu,<sup>b‡</sup> and WanZhen Liang<sup>a</sup>

Received Date

Accepted Date

DOI: 00.0000/xxxxxxxxxx

### 0.1 Electronic Structure

### 0.2 Optical Properties

### 0.3 About Experimental Device

Experimental device for 2D-materials strain usually available by bending it from various directions from other works<sup>1</sup>.

## Notes and references

- 1 H. J. Conley, B. Wang, J. I. Ziegler, J. Richard F. Haglund, S. T. Pantelides and K. I. Bolotin, *Nano Lett.*, 2013, **46**, 3626–3630.

<sup>a</sup> State Key Laboratory of Physical Chemistry of Solid Surfaces, Collaborative Innovation Center of Chemistry for Energy Materials, Fujian Provincial Key Laboratory of Theoretical and Computational Chemistry, and Department of Chemistry, College of Chemistry and Chemical Engineering, Xiamen University, Xiamen, Fujian 361005, People's Republic of China Email: liangwz@xmu.edu.cn

<sup>b</sup> Xiamen University, Xiamen, Fujian, People's Republic of China

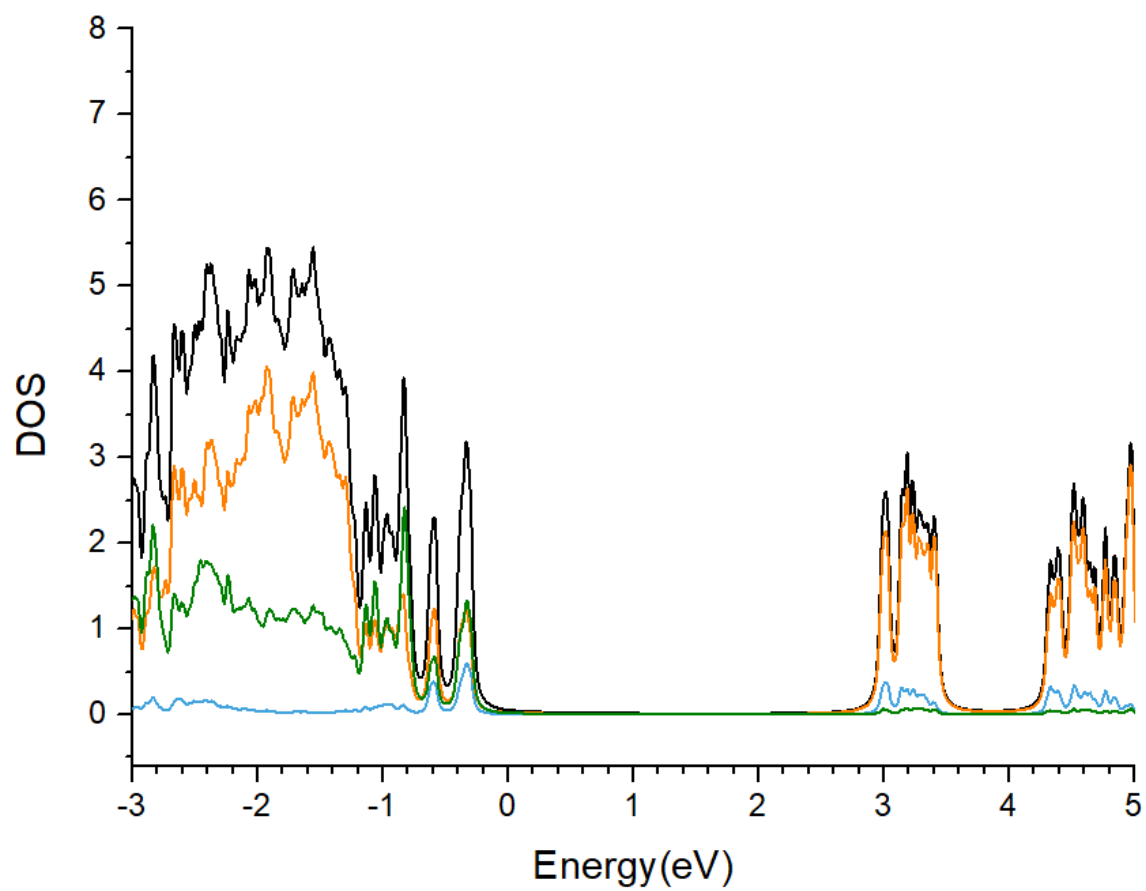

Fig. S 1 pDOS of bulk MA<sub>2</sub>[AgBi]Br<sub>6</sub> calculated by PBE0+SOC.

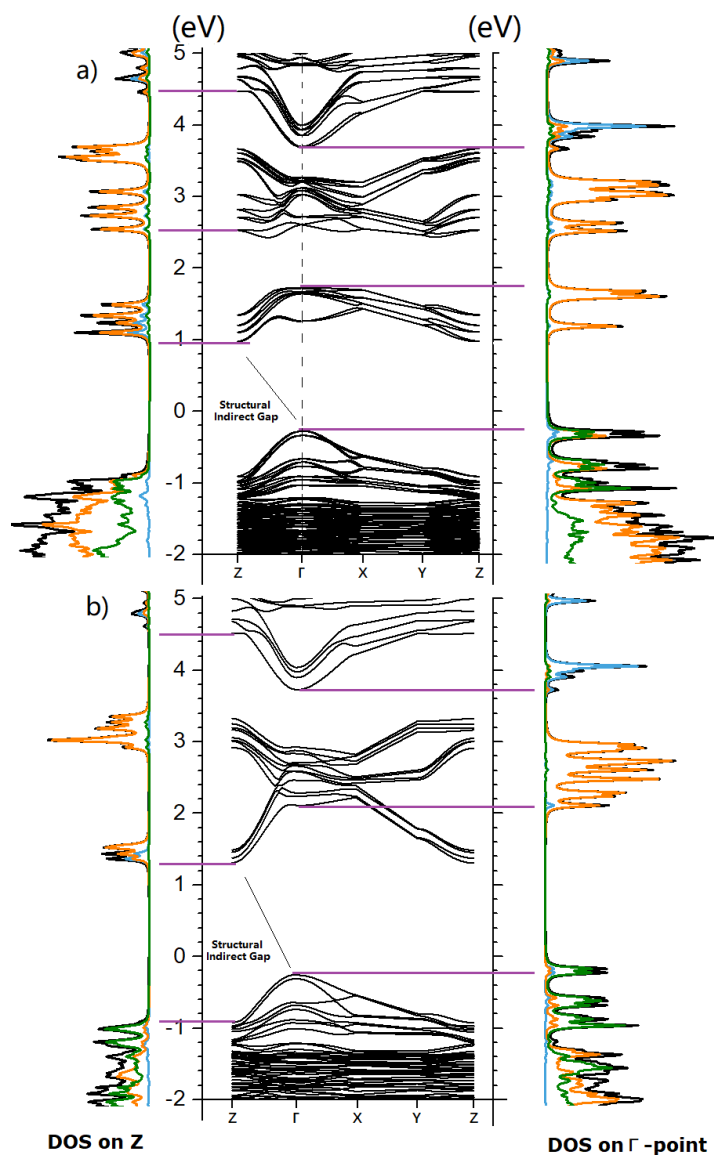

**Fig. S 2** Calculated band structure and DOS of bulk  $\text{MA}_2[\text{AgBi}]\text{Br}_6$  on  $\Gamma$ -point (*VBM peak, right panel*) and  $\Gamma$ -z point (*CBM valley, left panel*) by PBE, with (a) or without SOC (b). Note that green DOSs represent for Ag-4d orbitals and orange ones represent for Br-4p and Bi-6p orbitals; light blue DOSs are s-orbitals contributed.

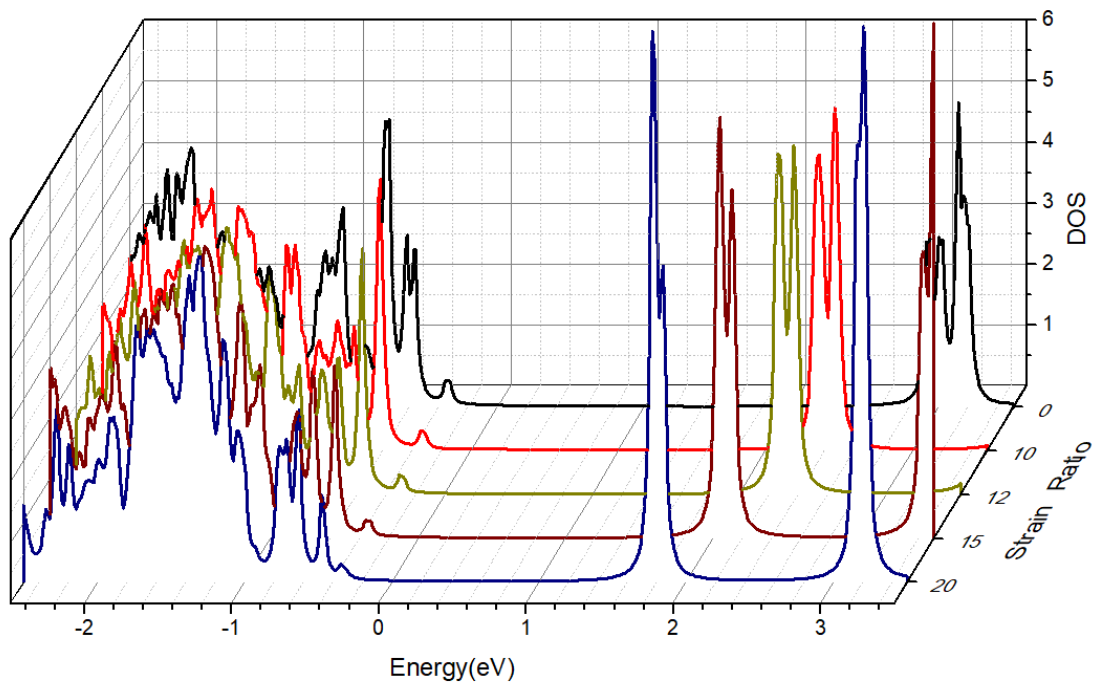

Fig. S 3 DOS of  $\text{MA}_4[\text{AgBi}]\text{Br}_8$  stretched over 10%

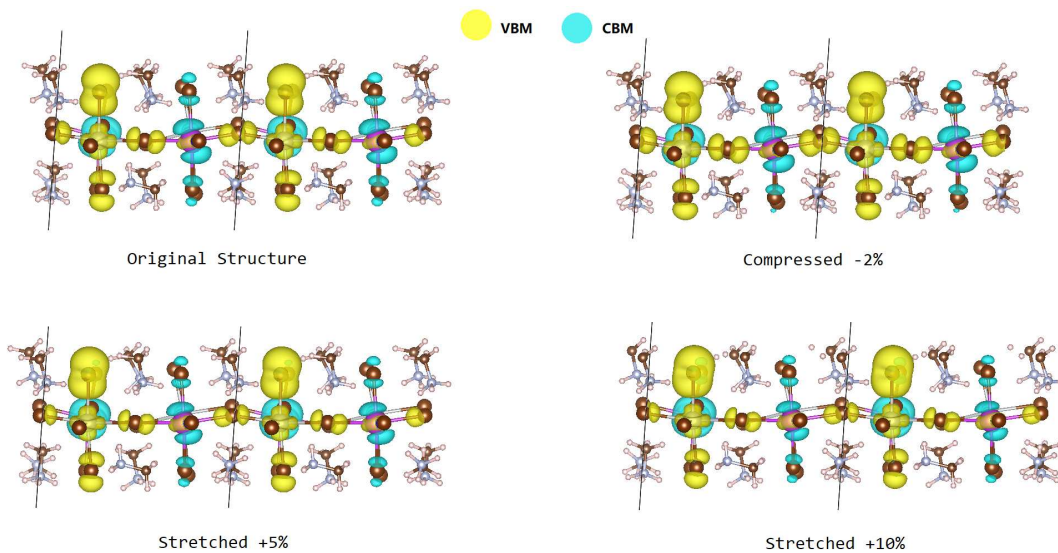

Fig. S 4 Charge distribution of Ag Bi and Br atoms in  $\text{MA}_4[\text{AgBi}]\text{Br}_8$  strained differently  
 Notice that yellow for VBM and cyan for CBM.

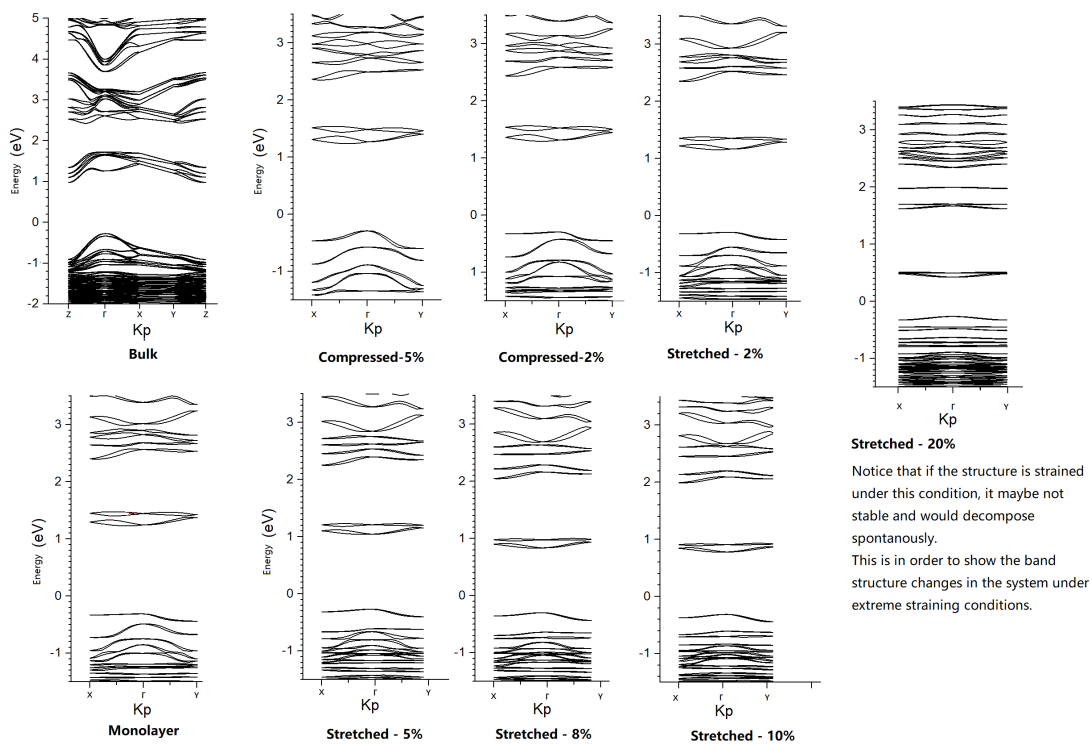

Fig. S 5 Band structure of  $\text{MA}_4[\text{AgBi}]\text{Br}_8$  strained variously from -5% to 20% and bulk  $\text{MA}_2[\text{AgBi}]\text{Br}_6$ , by PBE+SOC.

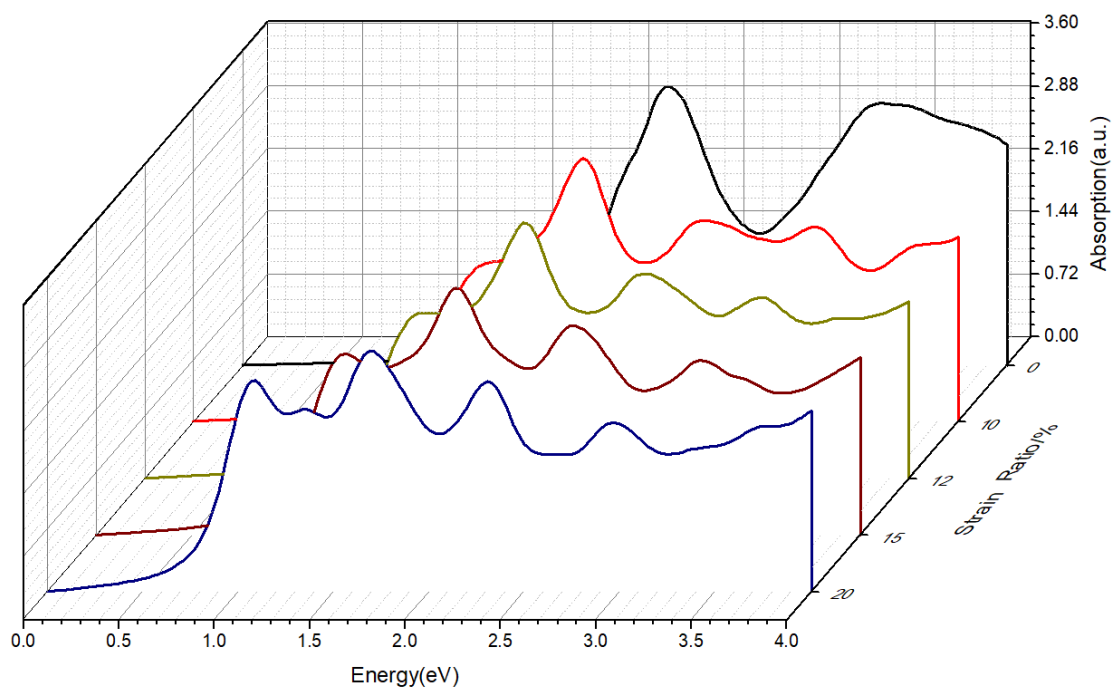

Fig. S 6 Absorption spectra of  $\text{MA}_4[\text{AgBi}]\text{Br}_8$  with a strain over 10%

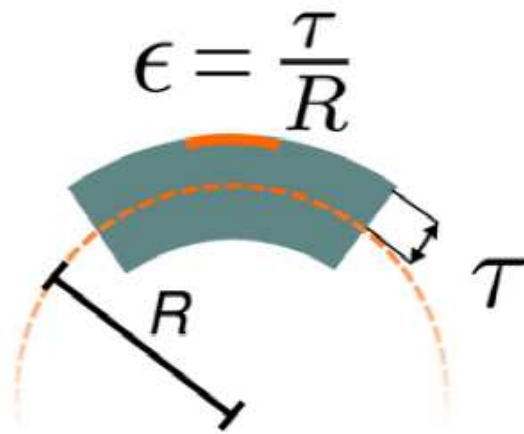

**Fig. S 7** Experimental Device for Strain 2D Materials<sup>1</sup>

*Schematic of the beam bending apparatus used to strain 2D materials*

*Notice that  $\epsilon$  represents for strain ratio;  $\tau$  for half of the thickness of the device and  $R$  for its curvature radius.*
